# Supplementary material
Source: publisher site journal article supplement (https://www.spandidos-publications.com/4656/downloadSupplementary)
Supplement: Supplementary file 1 [file downloadSupplementary]

## Sheet: Sheet1
Table SVI. Results of Gene Ontology molecular function analysis.
Category	Term	Count	%	P-value	Genes	List Total	Pop Hits	Pop Total	Fold Enrichment	Bonferroni	Benjamini	FDR
GOTERM_MF_DIRECT	GO:0005515~protein binding	3106	54.954	2.041e-64	JRK, NUP107, TFRC, ITSN1, SLA2, ALKBH6, ALKBH8, FAM110A, COMTD1, SCP2, DPYSL2, DPYSL3, PWWP2A, ANKFY1, SMCO4, GSTK1, ZNF18, SAP30BP, SECISBP2, PRKAB1, BCR, MTHFD1, FEZ1, DDIT3, FEZ2, ORAI3, AGTR1, TXNIP, ORAI1, MPPE1, UNC119B, SLBP, URI1, SET, SHMT2, NPRL2, ZNF20, ZC3HAV1, ZNF26, PRPSAP1, LARP1, SFN, GSTM4, HEXIM2, CREBBP, GSTM2, JUN, JAG1, NCAPH2, LARP7, EIF2AK2, LNPEP, PBX4, AGO3, AGO1, AGO2, S…	5010	8785	16881	1.1913	5.57192e-61	5.57192e-61	5.54539e-61
GOTERM_MF_DIRECT	GO:0044822~poly(A) RNA binding	474	8.38641	4.62808e-20	POP7, RPL3, TFRC, POP1, ENO1, RPL8, RPL6, RRP9, RAVER1, DDX17, DDX18, SECISBP2, RPL22, FNDC3A, GTPBP4, RC3H2, SND1, DDX39A, RPL26, RPL29, DUS3L, HOXB6, SLBP, PRKDC, RPN1, NOLC1, MRPL14, MRPL15, ZC3HAV1, MRPL13, MRPL11, MTDH, RRP7A, LARP1, PRDX1, GAR1, RRS1, SERPINH1, BTF3, JUN, MRPL28, LARP7, EIF2AK2, UPF3B, MAGOHB, MRPL21, PRRC2A, HNRNPL, CS, HNRNPM, HNRNPK, TBL2, AGO3, LAS1L, AGO1, AGO2, HNRNPD…	5010	1129	16881	1.41464	1.26347e-16	6.31734e-17	6.28725e-17
GOTERM_MF_DIRECT	GO:0042802~identical protein binding	295	5.21939	6.34307e-09	RB1, APP, AHCYL1, ARL6IP1, TFRC, MSANTD3, PKD2L1, ACCS, IKZF3, ACTB, IFIT3, TCL1A, TDO2, UBASH3B, DPYSL2, CHEK2, EPHB2, SKP2, SEPHS1, GLUL, TP63, TRIM23, GBP5, CPT1A, PHYKPL, DAPK1, MAP1S, JMJD6, HCFC1, NISCH, CLDN5, NIF3L1, CLDN3, DDX39A, CLDN9, CLPP, TMEM79, CSNK2B, BTK, PSME2, ORAI1, HPRT1, PRKD1, CBLL1, CGGBP1, L3MBTL1, GRB7, SHMT2, STXBP1, TPRG1L, PRPSAP1, PGBD1, PRDX3, LDHB, LDHA, SNX1, PRD…	5010	749	16881	1.32709	1.73164e-05	5.77219e-06	5.74471e-06
GOTERM_MF_DIRECT	GO:0005524~ATP binding	541	9.57183	1.08376e-08	PI4K2B, SMC4, SMC2, MYLK, CLP1, CDK20, CKMT1B, XYLB, DDX17, DDX18, PRKCI, CSNK2A1, DAPK1, PRKCE, DDX11, CSNK2A2, DICER1, PASK, BCR, ABCA10, ADCY9, DDX39A, MTHFD1, TYRO3, PRKCQ, IDNK, PRKD1, PIF1, ABCB1, NLRX1, ABCB6, PRKDC, AASDH, HSPA4L, NOLC1, FIGNL2, ABCB9, HSPH1, FIGNL1, MYO6, PLK4, LYN, DNAH12, CDK19, CHKA, ABCA6, ABCA3, EIF2AK1, PLK2, PLK1, DNAH14, ABCA9, EIF2AK2, CDC7, BRAF, ABCA8, CDC6, C…	5010	1495	16881	1.21932	2.95863e-05	7.39669e-06	7.36147e-06
GOTERM_MF_DIRECT	GO:0042803~protein homodimerization activity	281	4.97169	1.76039e-07	CDA, TFRC, ABAT, ACCS, NUDT5, IKZF3, PSMD7, GOLGA5, RPS19, CHEK2, FBXO4, CPNE1, SEPHS1, PDK2, ACVR1, ACOT7, SDS, DNTTIP1, MYO7A, ACTN4, HOGA1, HLA-G, JMJD6, RUNX1, RRAGA, DDIT3, HPRT1, PEX11A, PEX11B, ABCB9, ZBTB4, ADH5, GJC3, SNX1, PRDX4, SNX2, GRPEL1, FLRT3, PDCD10, STC2, GRPEL2, PDGFC, SYNDIG1, S100A13, HMOX1, APOE, RAB11FIP2, NKX2-5, S100A11, BARD1, GSTM4, JUN, XBP1, GSTM2, CHKA, BCL11A, FZD4…	5010	730	16881	1.29701	0.000480471	9.61172e-05	9.56595e-05
GOTERM_MF_DIRECT	GO:0019901~protein kinase binding	157	2.77778	5.47637e-07	CIB1, IRS2, LIPE, ZFP36, CCND2, RPS19, PPME1, DPYSL2, CHEK2, CDK5RAP1, CEP250, FBXO5, CDK5RAP3, KCNH1, PDGFRB, MEF2A, IFNAR2, MAP2K3, MAP2K1, BORA, OSR1, AP1B1, VRK1, ANK2, CDC25C, PRKAB1, CDC25A, CDC25B, EEF1A1, MAG, MSH2, CCNE2, CCNE1, CD8A, TRIB3, VDAC1, KIF20A, SKAP1, GRB7, BRSK1, MAPKAP1, STXBP1, STK39, ZBTB4, FAM83H, PRDX3, CCNB1, FAM83E, SOCS1, RACGAP1, PDCD10, TBC1D14, SFN, PLCG1, RAB11FI…	5010	376	16881	1.40693	0.00149393	0.000249175	0.000247988
GOTERM_MF_DIRECT	GO:0003824~catalytic activity	87	1.53928	2.10759e-06	ALDH1L1, AMY2B, ECI2, ACSM5, SPATA20, IDE, MED16, ACCS, CLYBL, PNP, AUH, SPTLC2, FLAD1, ENOSF1, FPGT, CDK5RAP1, CAPN3, DIP2A, PMPCA, UPP1, ENPP5, ADSL, PARP3, PCYT2, RSAD2, PHYKPL, AMY1A, GPT2, PGGHG, ATP6AP2, LANCL1, BCKDHB, TALDO1, PHKA1, CEL, CDYL, SYN2, RENBP, DUS2, DCTD, MTAP, DDAH1, ESPL1, ILVBL, SUCLG2, TKT, BCAT1, PIGG, GART, MOCS1, PIGH, BCAT2, ASAH1, PFKFB4, ACSS2, HPGD, AASDH, GMPR2, O…	5010	188	16881	1.55927	0.0057372	0.00082196	0.000818046
GOTERM_MF_DIRECT	GO:0003682~chromatin binding	159	2.81316	3.01449e-06	KDM1A, ELK1, ELK4, TRIM28, SOX15, TRIM24, RCC1, SVEP1, TP63, MEN1, MEF2A, MEF2C, SMARCC2, DDX11, EBF2, OVOL2, FOXP1, HCFC1, MSH6, AR, CSNK2B, ATF5, L3MBTL1, URI1, ENY2, DNMT1, DLX3, TSHZ3, SHMT2, TSHZ1, TSHZ2, GATA3, ORC1, RAD21, MCMBP, NKX2-5, TFAP2B, STAT5B, KLHDC3, CBX7, CREBBP, JUN, CBX5, AUTS2, PHF12, NONO, CBX2, HMGA1, SUPT5H, ESR1, SMARCA2, COQ7, TDRD3, NFKB1, NFKB2, POLA1, STAG1, BCL6, LH…	5010	391	16881	1.37019	0.0081958	0.0010287	0.0010238
GOTERM_MF_DIRECT	GO:0003924~GTPase activity	101	1.78698	1.32554e-05	RAB3C, NUDT1, TUBB8, EFTUD2, TUBB3, ARHGDIB, TRIM23, TGM2, RAB2A, GBP5, GTPBP8, GTPBP2, GTPBP4, GEM, TUBA4A, GTPBP3, EEF1A1, RRAGA, RAB30, RAB31, RRAGC, RRAGB, RAB35, RRAGD, RAB5B, RRAD, ARL3, ARL1, DNAJC27, GSPT2, GSPT1, RHOT1, RAB4A, RABL2A, RABL2B, TBCC, RAB27B, ERAL1, EEF2, GNG11, RHEB, GNAQ, GNAS, GNB5, DIRAS3, ARF1, RERG, GNGT1, TUBA1C, TUBA1B, TUBA1A, GNGT2, OPA1, MTG1, NKIRAS1, NKIRAS2, R…	5010	234	16881	1.45434	0.0355406	0.00402081	0.00400166
GOTERM_MF_DIRECT	GO:0098641~cadherin binding involved in cell-cell adhesion	118	2.08776	5.96101e-05	RPL34, PARK7, ENO1, BZW2, RPL6, CRKL, BAIAP2L1, PPME1, RUVBL1, ARFIP1, SH3GL1, TMPO, CAST, SH3GLB2, CSNK1D, SCRIB, SND1, HCFC1, ATXN2L, CHMP4B, TAGLN2, PKP3, RPL29, PFN1, PHLDB2, LRRC59, MACF1, UBFD1, ZC3HAV1, EVPL, PPL, NDRG1, CNN3, CCNB2, LDHA, SNX1, KLC2, LARP1, SNX2, PRDX1, MYO6, STK38, SFN, ARGLU1, SPTBN1, S100A11, MARK2, GCN1, SNX5, SPTBN2, VASP, HSPA5, PARVA, EEF2, PAICS, VASN, EHD1, ANLN,…	5010	290	16881	1.37102	0.150188	0.0162736	0.0161961
GOTERM_MF_DIRECT	GO:0003697~single-stranded DNA binding	46	0.813871	0.000107875	PRIM2, SWSAP1, BLM, MCM7, PRIM1, HMGB2, XPC, MCM10, YBX1, PARK7, HSPD1, RAD51AP1, PURA, CDC45, HNRNPDL, POLR2D, LONP1, POLR2G, HNRNPA1, DDX11, XRCC3, RAD23A, WBP11, POU4F1, LRPPRC, NME1, RAD51D, NEIL3, RAD51, RAD51C, HNRNPK, MSH2, MSH3, ERCC1, SUB1, FUBP1, CRY2, RPA4, MCM4, RBMS1, ERCC5, MCM6, SSBP1, SSBP2, SSBP3, SSBP4	5010	93	16881	1.66662	0.255106	0.0266924	0.0265653
GOTERM_MF_DIRECT	GO:0008017~microtubule binding	88	1.55697	0.000117329	NUMA1, KIF14, KIF11, KIF17, WDR43, KIF15, MAP1LC3A, OPA1, KIF5C, DPYSL2, NUSAP1, KIF13B, ZNF207, KIF21A, KIF21B, KIF1A, DNM1L, NEFH, SYBU, GABARAPL2, GAS2L3, MAP1S, KIF24, KIF23, KIF22, CCSAP, MID1, EML1, MID2, DNM1, DNM2, CLIP3, EML4, NEIL2, PSRC1, KIF2A, KIFC2, KIF16B, KIFC1, NME8, MAP1A, BIRC5, KIF20A, MAPT, S100A9, GAPDH, SAXO2, S100A8, PAFAH1B1, MACF1, ARL3, KATNB1, NDRG1, GABARAP, JAKMIP3, …	5010	208	16881	1.42554	0.274088	0.0266924	0.0265653
GOTERM_MF_DIRECT	GO:0019899~enzyme binding	129	2.28238	0.000333676	SCARB2, APP, KDM1A, GLDC, PARK7, SLC4A2, PYCARD, CDC20, PREX1, ZFP36, KAT8, BANF1, LGALS9, PDGFRB, ARMT1, PRKCE, ANK2, HDHD2, PUS7, TUBA4A, PIAS1, BCR, AR, POR, MSH2, PPP1R3B, MSH3, PGR, RAF1, PHLDB3, SLC27A2, NOTCH1, RPS19BP1, PRKDC, FOXO4, HACD2, ACAT1, STC2, MLEC, HMOX1, MAP2K7, GSTM4, LYN, AKIRIN2, CDK19, GSTM2, JUN, NOP14, YES1, UBE2I, CPSF1, HSPA5, CBX3, CAV1, HMGA1, HSPA2, SUPT5H, ESR1, IG…	5010	333	16881	1.30529	0.597913	0.0671202	0.0668006
GOTERM_MF_DIRECT	GO:0019903~protein phosphatase binding	33	0.583864	0.000344206	VCP, CDKN1B, STX17, MVP, IRS2, PIK3R1, HSP90B1, CDH5, CDH2, PPME1, PPP6R1, PPP6R3, HSF4, NEK2, CSK, STAT6, KCNN4, MAP2K7, JAK1, STAT5B, HSP90AA1, STAT3, TRAF2, AP3B1, PPP1R3C, DLG4, TRAF3, LCK, ANAPC4, GRB2, PPARG, FBXL2, SKAP1	5010	63	16881	1.76496	0.609311	0.0671202	0.0668006
GOTERM_MF_DIRECT	GO:0031625~ubiquitin protein ligase binding	113	1.99929	0.000394965	RB1, UBE2Z, TRIM28, CHEK2, KCNH2, GABARAPL2, FBXW7, STX8, YOD1, MID1, SCAMP3, PIAS2, PIAS1, RRAGA, CDC34, UBE2V2, TXNIP, TRIB3, UBE2V1, ANKRA2, VCP, TSG101, CUL5, CUL2, CUL1, GABARAP, BTBD3, HLTF, TNFRSF14, NAE1, LYN, MOAP1, XBP1, UBE2I, UBE2B, HSPA5, WFS1, UBE2C, FZD4, GLMN, FZD8, UBE2A, ERLIN2, ABTB2, ABTB1, UBOX5, NPLOC4, UBE2S, UBE2T, TOLLIP, BCL2, UBE2O, CALR, UBE2M, GPI, GSK3B, CD40, ARRB1,…	5010	287	16881	1.32665	0.659884	0.0718837	0.0715414
GOTERM_MF_DIRECT	GO:0000287~magnesium ion binding	84	1.4862	0.000481255	TOP2A, FEN1, ARF1, DYRK3, DYRK2, PTEN, CIB2, ENO1, NUDT5, COMT, ENO4, NUDT3, CLYBL, RPS6KA4, RPS6KA5, IMPA1, OPA1, IMPA2, ENOSF1, RPS6KA2, NCS1, PGM3, NUDT18, PGM5, NUDT16, XXYLT1, MTPAP, GLUL, MAP3K7, ENOPH1, PSPH, SPHK1, TESC, ATP11C, YDJC, GEM, NME1, MSH6, PKM, PPA2, MSH2, RRAGC, MTHFD2, PPA1, ILVBL, SIK3, HPRT1, PRPS2, NIM1K, BRSK1, PIF1, INPP1, FOXK2, PDXP, ADCY2, STK4, STK3, PRPSAP1, HMGCL,…	5010	204	16881	1.38743	0.731296	0.0821142	0.0817232
GOTERM_MF_DIRECT	GO:0001948~glycoprotein binding	33	0.583864	0.000698973	HSP90AB1, TFRC, ITGB2, TGFA, PLAT, IDE, FOXRED2, ERLEC1, OS9, FLNA, FBXO6, LDLR, CTSA, HSP90AA1, VWF, HSPA5, ITGA3, EDEM2, CSNK1D, IGF2R, SELP, ACE2, F7, CD4, AZGP1, LCK, DNAJC5, RASA1, PIP, CNTN1, CALR, BMPR1B, STX1A	5010	65	16881	1.71065	0.851751	0.112247	0.111712
GOTERM_MF_DIRECT	GO:0051536~iron-sulfur cluster binding	13	0.230007	0.00127705	GLRX3, RSAD2, ETFDH, ELP3, ABAT, NUBP1, NFU1, NFS1, NDUFS7, PPAT, CDK5RAP1, CIAPIN1, ISCU	5010	18	16881	2.4335	0.969456	0.182982	0.18211
GOTERM_MF_DIRECT	GO:0001077~transcriptional activator activity, RNA polymerase II core promoter proximal region sequence-specific binding	93	1.64544	0.00128674	FOXA1, GMEB1, ONECUT2, SIX1, HOXC13, YBX1, NR3C1, MEOX2, CARF, ELK1, MEOX1, GLI3, GLI2, ELK3, HOXA10, DBP, SIX4, SOX18, MYC, HNF4A, MYB, JUNB, PITX1, HOXA5, SOX4, TP63, GABPA, MEF2A, SREBF1, MEF2C, FOXD1, TCF12, EBF1, EBF2, SOX11, EBF3, MITF, FOS, AR, ELF1, PLSCR1, NR5A2, ELF4, IRF1, DDIT3, PGR, ATF4, CEBPB, HLF, DLX3, EPAS1, CEBPG, LEF1, FOXK2, HOXD13, GATA3, HLTF, PLAGL2, NDN, OTX1, E2F4, NKX2-…	5010	236	16881	1.3278	0.970254	0.182982	0.18211
GOTERM_MF_DIRECT	GO:0002039~p53 binding	33	0.583864	0.00134052	GSK3B, BLM, SMARCB1, KDM1A, USP10, EHMT2, TRIAP1, RCHY1, CDKN2AIP, HSPD1, BCL2L12, NUAK1, MUC1, ZMAT1, ZMAT3, TRIM24, SMYD2, TP53BP2, ZNF385B, ZNF385D, KMT5A, TP53BP1, BRD7, ZNF385A, TP63, CREBBP, CDKN2A, EEF2, SIRT1, SMARCA4, CDK5, RFWD3, MAPKAPK5	5010	67	16881	1.65959	0.974321	0.182982	0.18211
GOTERM_MF_DIRECT	GO:0043142~single-stranded DNA-dependent ATPase activity	9	0.159236	0.00146355	RFC5, POLQ, RFC3, RAD51, RFC4, RFC2, DSCC1, DNA2, CHTF18	5010	10	16881	3.03251	0.981655	0.190262	0.189356
GOTERM_MF_DIRECT	GO:0051087~chaperone binding	38	0.672328	0.00164271	USP13, CDKN1B, ATP1A2, TIMM10, HSPD1, STIP1, GRPEL1, GRPEL2, HES1, BAK1, FNIP1, CTSC, GET4, UBL4A, SDF2L1, VWF, HSPA5, HLA-B, TBCD, AHSA1, TBCC, TSC1, TIMM44, CP, SOD1, DNAJA1, DNAJC3, ALB, DNAJA2, TBCE, DNLZ, OGDH, BAX, BIRC5, HYOU1, CALR, GNB5, PFDN6	5010	81	16881	1.58073	0.98876	0.203845	0.202875
GOTERM_MF_DIRECT	GO:0008134~transcription factor binding	108	1.91083	0.00213494	RB1, FOXA1, KDM1A, GTF2B, HDAC11, RORA, PARK7, RORB, CHCHD2, SOX17, MYC, PIM1, KAT8, JUNB, HES6, TLE1, LMO4, KCTD1, MED6, PIAS2, RUNX1, PIAS1, AR, NIF3L1, KAT6B, DDIT3, CSNK2B, ZFPM2, TRIM11, PRKDC, EPAS1, GATA3, PIK3R1, FOXO4, STK4, STK36, NLRP3, NKX2-5, PPARGC1B, CREBBP, JUN, UBE2I, HMGA1, SNF8, ESR1, NFKB1, SMARCA4, MLXIPL, ID1, BCL2, HNRNPD, UBA2, ID3, RCOR3, RCOR2, SLC26A5, THRA, HMGB2, FHL2…	5010	284	16881	1.28134	0.997075	0.23697	0.235842
GOTERM_MF_DIRECT	GO:0030515~snoRNA binding	14	0.2477	0.00217006	NOP56, UTP6, NOP58, NOP14, IMP3, HEATR1, NUDT1, DDX21, IMP4, NUDT16L1, NUDT5, PWP2, NHP2, NUDT16	5010	21	16881	2.24631	0.997343	0.23697	0.235842
GOTERM_MF_DIRECT	GO:0004298~threonine-type endopeptidase activity	14	0.2477	0.00217006	PSMB10, PSMA7, PSMB9, PSMA5, PSMB6, PSMA6, PSMB7, PSMA3, PSMB4, PSMA4, PSMB5, PSMB2, PSMB3, PSMB1	5010	21	16881	2.24631	0.997343	0.23697	0.235842
GOTERM_MF_DIRECT	GO:0003777~microtubule motor activity	37	0.654636	0.00259206	DYNC1I2, DNAH1, DNAH7, DNAH6, KIF14, KIF11, KIF17, DNALI1, KIF15, KLC3, KLC2, KIF5C, KIF13B, NPHP3, KIF21A, KIF21B, KIF3C, KIF1A, BBS4, DYNC2H1, DNAH12, DNAH14, KIF24, KIF23, KIF22, CENPE, KIF18A, KIF18B, APPBP2, KIF2A, KIFC2, KIFC1, KIF16B, KIF4A, DYNLRB2, KIF2C, KIF20A	5010	80	16881	1.55838	0.999163	0.272167	0.270871
GOTERM_MF_DIRECT	GO:0030374~ligand-dependent nuclear receptor transcription coactivator activity	26	0.460014	0.00279574	ENY2, CALCOCO1, SMARCD3, TSG101, KDM1A, SRA1, FGF2, HELZ2, PSMC3IP, MED14, MED30, ZMIZ2, PPARGC1B, NCOA1, NCOA6, BUD31, NCOA3, USP22, HMGA1, ACTN4, PPRC1, WDR77, CARM1, NCOA7, PPARG, PKN1	5010	51	16881	1.71776	0.999521	0.28268	0.281334
GOTERM_MF_DIRECT	GO:0003713~transcription coactivator activity	95	1.68082	0.00311439	RB1, KDM5A, PHF2, TCERG1, CALCOCO1, GMEB1, SMARCB1, GMEB2, SETD3, CITED1, CITED2, RNF14, TGFB1I1, FHL2, SRA1, TCF20, UBE3A, BRCA1, PARK7, FHL5, MED16, CD3D, PQBP1, TAF7L, MED14, SOX17, SAP130, TRIM24, JUNB, GABPA, DDX17, NCOA1, ABT1, SMARCC2, RIPK3, NCOA6, NCOA3, ACTL6A, ARID5B, MED27, MED26, SUPT3H, MED6, PIAS2, MED7, PIAS1, HCFC1, TAF6L, ZEB1, TFDP1, CCNE1, SUB1, TBPL1, VGLL1, PPARD, YAP1, MEG3…	5010	248	16881	1.29072	0.9998	0.303653	0.302207
GOTERM_MF_DIRECT	GO:0004871~signal transducer activity	80	1.41543	0.00332631	SLC35B2, CD40, ECM1, IRS1, PLEKHB1, IRS2, IL1RAP, CRKL, GNGT1, TMEM101, GJA1, GNGT2, STMN1, PPFIA1, CAPN3, LGALS9, WLS, UNC13B, IL15RA, TICAM2, IL11RA, RIPK2, PRKCE, FST, ZDHHC13, TRAF2, ZDHHC17, PLCB4, TRAF3, TRIM13, PKP1, AVP, S100A9, SLC20A1, GNAI3, GNA14, GNG2, GNG4, GNG7, GNA12, MIER1, FLNA, HMOX1, STAT6, PLCG1, ECT2, SH2B2, SH2B1, STAT5A, STAT5B, CREBBP, CHKA, STAT1, PLK2, NEK6, PLCL1, TNK1…	5010	204	16881	1.32136	0.999888	0.304991	0.303538
GOTERM_MF_DIRECT	GO:0003690~double-stranded DNA binding	37	0.654636	0.00335155	FEN1, HLF, PRKDC, HMGB2, AKAP8, HMGB3, YBX1, PARK7, AFF3, ELK1, RAD51AP1, HNRNPDL, MYC, TDG, TP63, MEN1, XRCC6, CENPX, MTERF3, STAT1, ZBTB16, DDX11, XRCC3, MND1, GTF2H4, MSH6, CORT, RAD51D, NEIL3, RAD51, RAD51C, AIM2, SLTM, MSH2, RBMS1, ERCC5, CGGBP1	5010	81	16881	1.53914	0.999895	0.304991	0.303538
GOTERM_MF_DIRECT	GO:0035925~mRNA 3'-UTR AU-rich region binding	9	0.159236	0.00396538	ZFP36, CPEB1, CPSF1, KHSRP, HNRNPD, CPEB3, CPEB2, ZFP36L2, ZFP36L1	5010	11	16881	2.75683	0.999981	0.334639	0.333045
GOTERM_MF_DIRECT	GO:0009055~electron carrier activity	40	0.707714	0.00400163	DMGDH, ACADVL, NCF1, GLDC, ETFDH, GLRX, COX5A, ADH5, AKR7A2, AKR7A3, AIFM1, RDH16, ME1, AOX1, SH3BGRL3, PHGDH, ACADM, ME2, ACAD11, ACAD8, GLRX3, PTGES2, SRD5A1, TXNRD1, ACAD9, DHDH, CYBA, GLRX2, AKR1C4, SDHA, ACADSB, QDPR, UGDH, POR, ACOX2, ACOX1, IVD, NDUFS3, CIAPIN1, IDO1	5010	90	16881	1.49754	0.999982	0.334639	0.333045
GOTERM_MF_DIRECT	GO:0004672~protein kinase activity	131	2.31776	0.00412058	RPS6KA5, TRIM28, RPS6KA2, CHEK2, CHEK1, CDK20, PDK4, PDK3, NEK1, NEK2, PIM2, STK32B, MAP3K7, PDK2, ACVR1, MAP2K3, MAP2K4, CDKL3, PRKCI, MAP2K1, MAP2K2, CSNK2A1, DAPK1, PRKCE, CSNK2A2, CASK, VRK1, CSNK1D, PRPF4B, PASK, PRKAB1, NRBP1, MELK, SIK3, BTK, MAPKAPK5, TRIB3, PRKCQ, ROR2, RAF1, BRSK1, PXK, PRKDC, NPR2, NPRL2, STK39, WNK4, PKMYT1, STK4, STK3, NUAK1, IRAK1, STK36, MAP2K7, MAP2K5, SRPK2, SRPK…	5010	359	16881	1.22952	0.999987	0.334639	0.333045
GOTERM_MF_DIRECT	GO:0005102~receptor binding	129	2.28238	0.00416766	CD86, APP, ECI2, PLAT, PARK7, PVR, CDH5, GJA1, ALCAM, SCP2, NUDT19, TNFSF10, TRIM24, NRTN, EPHB2, ICOSLG, PDGFRB, GSTK1, ACOT8, IGFBP4, HLA-B, MIF, HLA-F, HLA-G, AR, MAG, CSNK2B, BTK, PGR, PFN1, SLC27A2, ACOT4, NXPH3, NXPH4, LPL, C3, PCSK1N, C5, PRDX5, DVL3, CYTL1, HACL1, IGFBP6, TAC1, CD276, FZD1, LYN, FIS1, GSTM2, YES1, EPHX2, CAV1, TNK1, TNFSF13, MSN, FZD8, PTK2, EFNA1, PTPRD, CXCL10, DIAPH1, …	5010	353	16881	1.23133	0.999989	0.334639	0.333045
GOTERM_MF_DIRECT	GO:0051539~4 iron, 4 sulfur cluster binding	22	0.389243	0.00441798	PRIM2, RSAD2, DDX11, IREB2, ETFDH, LIAS, NUBP1, NFU1, POLA1, NDUFS8, NDUFS7, POLD1, PPAT, CDK5RAP1, EXO5, ACO1, DNA2, MOCS1, POLE, NDUFV1, ISCU, MUTYH	5010	42	16881	1.76496	0.999994	0.344603	0.342962
GOTERM_MF_DIRECT	GO:1990841~promoter-specific chromatin binding	13	0.230007	0.00463039	ZNF683, EGR1, DNMT1, EHMT2, CHD7, FOXO4, BMI1, WDR13, RBL1, TRIM28, HSF1, E2F4, EZH2	5010	20	16881	2.19015	0.999997	0.34705	0.345397
GOTERM_MF_DIRECT	GO:0000166~nucleotide binding	127	2.24699	0.0047036	SLC27A1, MSI1, NUBP1, ALKBH8, RDM1, RAVER1, MTPAP, ABT1, CIRBP, LARP4B, NCL, SRSF2, VDAC3, VDAC2, SRSF5, SREK1, HPRT1, SRSF7, SRSF8, SNRPA, SRSF9, SLC22A4, PXK, TMEM63B, CSTF2, ORC5, RRP7A, HNRNPDL, VPS11, PPARGC1B, CPSF6, RBPMS, ALYREF, NONO, UPF3B, LARP7, CDC6, HNRNPL, POLA1, HNRNPM, CPEB1, RCAN2, RCAN3, HNRNPD, TDRD10, CPEB3, CPEB2, RPS24, ITPA, RBM28, GPSM2, RBM25, DAZAP1, MOCS2, CELF6, PTBP1…	5010	348	16881	1.22966	0.999997	0.34705	0.345397
GOTERM_MF_DIRECT	GO:0016887~ATPase activity	72	1.27389	0.00490928	EIF4A2, SWSAP1, ABCD3, KIF14, IDE, KIF15, RUVBL2, RUVBL1, KIF13B, DHX16, KIF21A, KIF21B, KIF1A, ABCD1, DYNC2H1, ABCC1, RFC3, HSP90AA1, DST, KIF24, KIF23, WRNIP1, KIF22, ATP1B1, MSH6, VWA8, ABCA10, DDX39A, KIF2A, MSH2, KIFC2, KIFC1, KIF2C, KIF20A, DNA2, ABCG2, MACF1, BLM, VCP, DNAH1, DNAH7, VPS4A, DNAH6, ATP1A2, HSPD1, RNF213, HLTF, KIF3C, ABCF2, ABCF3, MDN1, ABCF1, DNAH12, HSPA5, ABCA6, ATP13A1, …	5010	183	16881	1.32569	0.999999	0.352693	0.351014
GOTERM_MF_DIRECT	GO:0003725~double-stranded RNA binding	29	0.513093	0.00528798	HSP90AB1, STAU1, TFRC, DDX21, SLC3A2, HSPD1, MTDH, OASL, IFIH1, TUBA1B, DHX36, DROSHA, EIF2AK2, MSN, DICER1, TUBB4B, ILF2, MRPL44, DUS2, SUPV3L1, YRDC, OAS1, AGO3, OAS2, AGO1, AGO2, TLR8, TLR3, SIDT2	5010	61	16881	1.60187	0.999999	0.370159	0.368396
GOTERM_MF_DIRECT	GO:0008536~Ran GTPase binding	17	0.300778	0.00562532	IPO13, RANBP1, NXT1, CSE1L, NUTF2, RANGAP1, IPO4, RANBP3L, IPO9, XPO1, XPOT, NUP50, XPO6, XPO5, BIRC5, TNPO1, TNPO2	5010	30	16881	1.90936	1	0.383928	0.3821
GOTERM_MF_DIRECT	GO:0019904~protein domain specific binding	80	1.41543	0.00594602	FOXA1, THRA, ICA1, HMGB2, DIXDC1, IRS2, TUBA1A, XPO1, YWHAQ, CHMP1A, CEP250, ARFIP1, HOMER3, ZNF521, YWHAG, TGM2, NCK1, YWHAH, CEP68, PRKCI, ITGA3, TUBB, WNT5A, PLAUR, MYO7A, DICER1, YWHAZ, PIAS1, TFDP1, TFDP2, HGS, CSNK2B, STAMBP, STX1A, TRIM11, RAPGEF3, DDC, VCP, STXBP1, ICA1L, VPS4A, MRPS31, ARL1, GNAI3, MRPL17, CAPG, EPB41L5, PPP3R1, EFS, TDG, VPS11, SFN, E2F4, SNCA, IGBP1, ESRRA, GSN, HSPA5,…	5010	208	16881	1.29595	1	0.395918	0.394032
GOTERM_MF_DIRECT	GO:0005096~GTPase activator activity	103	1.82236	0.00745546	USP6NL, FAM13B, ARHGAP39, RGS5, PREX1, ARHGDIA, ARHGDIB, TBC1D22B, TBC1D10B, AGFG1, RALGAPA1, STARD8, BCR, DEPDC1B, ACAP1, RALGAPB, ADGRB3, RIN3, PREB, RIN2, LLGL2, TBC1D19, NPRL2, RASAL1, ARHGAP12, ARHGAP22, ABR, ARHGAP20, RACGAP1, TBC1D13, TBC1D14, NCKAP1L, SRGAP3, SRGAP2, ECT2, TBC1D17, TBC1D8B, STARD13, JUN, ANKRD27, GRTP1, TBCD, ARHGAP24, ARHGAP32, TBCK, ARHGAP30, GNAQ, PLXNB1, GNB5, ARHGAP1…	5010	279	16881	1.24392	1	0.484605	0.482297
GOTERM_MF_DIRECT	GO:0042043~neurexin family protein binding	10	0.176929	0.0076353	NLGN1, NLGN2, NLGN4X, SYTL1, CPE, CASK, CEL, SYTL4, SYTL3, SYTL2	5010	14	16881	2.40676	1	0.484753	0.482444
GOTERM_MF_DIRECT	GO:0005525~GTP binding	137	2.42392	0.0081078	RAB3C, GUCY1B2, RTKN, RASL11B, RASL11A, RASEF, NUDT2, ACSM5, IFI44L, TUBB8, EFTUD2, TUBB3, FPGT, NUDT16, SEPHS1, TRIM23, TGM2, RAB2A, GBP5, RAB2B, DAPK1, ARL15, GTPBP8, GTPBP2, GTPBP4, GEM, TUBA4A, GTPBP3, EEF1A1, RRAGA, RAB30, RAB31, RRAGC, RRAGB, RAB35, RRAGD, SUCLG2, RABL6, ARL9, RAB5B, RRAD, NPR2, ARL3, ARL1, NOLC1, AK3, DNAJC27, GSPT2, GSPT1, RHOBTB2, RHOT1, PCK2, RAB4A, RABL2A, RABL2B, RAB2…	5010	384	16881	1.20213	1	0.503052	0.500656
GOTERM_MF_DIRECT	GO:0003723~RNA binding	189	3.34395	0.00886796	AHCYL1, RPL3, RPL34, RTCA, MSI1, THUMPD1, SRP14, NR3C1, IFIT1, RPL8, RPL9, IFIT3, RPL6, IFIT2, RDM1, FBL, HENMT1, SNRPD1, KHSRP, JUNB, AGFG1, DDX17, ABT1, DDX18, KHNYN, DDX11, PUS1, RPL22, CIRBP, GTF3A, THOC3, PUS7, ILF2, JMJD6, DKC1, NCL, UNC50, NHP2, SNRPG, RPL26, SRSF5, NUP98, SNRPF, RPL29, SNRPA, SNRPB, GRB7, DNMT1, RNASEH2A, CSTF3, IREB2, CSTF2, MRPL12, CDKN2AIP, HSP90B1, RAD51AP1, EMG1, ATX…	5010	547	16881	1.16422	1	0.53799	0.535428
GOTERM_MF_DIRECT	GO:0008022~protein C-terminus binding	70	1.2385	0.0100935	TOP2A, MDC1, CALCOCO1, ECM1, CITED1, CEP120, HSPB7, ATP2A2, CIB1, MKI67, CDC20, YWHAQ, CEP250, HOMER3, BANF1, TOPBP1, HRAS, MAGI1, MAP2K1, CEP135, DST, ATP1B1, SIRT1, DNM1, PIAS1, HIC2, BCAM, MSH2, LCK, NCL, EFHC1, PABPC1, MAPRE1, NEIL1, IFT46, VGLL1, ATF4, YAP1, PXK, SRC, VPS4A, OPRL1, FBLN1, CORO1A, FBLN5, PPP2CA, PRDX3, STIP1, ATXN1, CSK, SASH1, XRCC6, KCNJ11, TAF13, ZBTB16, SCLT1, SNF8, BAIAP…	5010	182	16881	1.29595	1	0.599029	0.596176
GOTERM_MF_DIRECT	GO:0003689~DNA clamp loader activity	7	0.12385	0.010635	RFC5, RFC3, RFC4, RFC2, DSCC1, RAD17, CHTF18	5010	8	16881	2.94828	1	0.604868	0.601987
GOTERM_MF_DIRECT	GO:0008320~protein transmembrane transporter activity	7	0.12385	0.010635	TOMM70, AZGP1, TOMM40, TOMM7, NUTF2, TOMM22, GPIHBP1	5010	8	16881	2.94828	1	0.604868	0.601987
GOTERM_MF_DIRECT	GO:0005159~insulin-like growth factor receptor binding	10	0.176929	0.0140995	SOCS2, SOCS1, IRS1, IGF2, GNAS, ARRB1, IGF1, PIK3R1, YWHAG, YWHAH	5010	15	16881	2.24631	1	0.785544	0.781803
GOTERM_MF_DIRECT	GO:0004386~helicase activity	36	0.636943	0.015419	EIF4A2, BLM, ERCC6L, DDX27, DDX24, MCM8, DDX23, CHD7, EIF4A3, DDX41, HELZ2, IFIH1, DHX32, DHX34, HLTF, DHX36, DHX37, RAD54L, EIF4B, DDX17, DDX18, HELLS, HELQ, DDX55, DDX11, ATRX, DDX31, HELZ, DICER1, SMARCA2, SMARCA4, SUPV3L1, DDX19A, ERCC3, DNA2, SNRNP200	5010	85	16881	1.42707	1	0.821338	0.817427
GOTERM_MF_DIRECT	GO:0035091~phosphatidylinositol binding	36	0.636943	0.015419	GRB7, PXK, NCF1, NCF4, ITPR1, NOXO1, TULP3, ITPR2, ITPR3, SNX10, SNX33, SNX30, PITPNC1, PLD2, SNX1, SNX2, SH3PXD2A, SNX25, FCHO2, TNFAIP8L3, SBF2, SNX8, SNX5, PHF12, SNX21, PASK, WDR35, NISCH, ARHGAP32, CCDC88A, SNX19, PITPNM1, FES, KIF16B, MITD1, SGK3	5010	85	16881	1.42707	1	0.821338	0.817427
GOTERM_MF_DIRECT	GO:0030170~pyridoxal phosphate binding	26	0.460014	0.0159344	DDC, SHMT2, GLDC, TAT, HDC, ABAT, PYGL, ACCS, CSAD, SRR, NFS1, SPTLC2, KYNU, SDS, GOT1, PHYKPL, AADAT, GAD1, GPT2, MOCOS, THNSL2, ALB, KYAT3, KYAT1, BCAT1, BCAT2	5010	57	16881	1.53695	1	0.821338	0.817427
GOTERM_MF_DIRECT	GO:0051287~NAD binding	19	0.336164	0.0159454	AHCYL1, AHCY, HIBADH, HPGD, MDH1, IDH2, LDHB, UGDH, LDHA, GPD1, ME1, AOX1, PHGDH, ME3, GPD1L, ME2, GAPDH, NDUFV1, GLYR1	5010	38	16881	1.68473	1	0.821338	0.817427
GOTERM_MF_DIRECT	GO:0043024~ribosomal small subunit binding	9	0.159236	0.016979	PIM1, MTIF2, DHX29, MTIF3, ERAL1, ABCE1, CPEB2, EIF4B, NME1	5010	13	16881	2.3327	1	0.858384	0.854296
GOTERM_MF_DIRECT	GO:0005539~glycosaminoglycan binding	11	0.194621	0.0193356	TGFBR3, VCAN, EGFLAM, PODXL2, SPOCK2, LTBP4, NDNF, DCN, SERPINA5, ENG, TGFBR2	5010	18	16881	2.05912	1	0.935755	0.931299
GOTERM_MF_DIRECT	GO:0008201~heparin binding	61	1.07926	0.0198155	APP, NRP1, ECM2, PDCD5, CXCL13, FGF1, FGF2, SERPINA5, COMP, ADAMTS5, ADAMTSL5, LIPG, ZNF207, CTSG, POSTN, RPL22, APLP1, PCOLCE, CEL, TGFBR3, GREM2, CCDC80, CRISPLD2, ANOS1, ANG, RPL29, PAFAH1B1, LTF, FBLN7, CFH, CHRD, LPL, NDNF, PTN, THBS2, FSTL1, THBS4, CLEC3B, CCL8, CCL7, ABI3BP, SLIT3, SLIT2, APOE, ELANE, AOC1, VEGFB, BMP7, VEGFA, SELP, BMP4, CXCL10, SMOC2, CXCL11, COL5A3, OGN, HDGF, FMOD, FGF…	5010	160	16881	1.28461	1	0.935755	0.931299
GOTERM_MF_DIRECT	GO:0070182~DNA polymerase binding	8	0.141543	0.0202907	FANCI, ACD, RAD51, PCNA, FANCD2, LONP1, SMG5, SMARCA4	5010	11	16881	2.45052	1	0.935755	0.931299
GOTERM_MF_DIRECT	GO:0035259~glucocorticoid receptor binding	8	0.141543	0.0202907	NR4A2, STAT5B, CEBPB, FLT3, STAT3, NRIP1, ETS2, YWHAH	5010	11	16881	2.45052	1	0.935755	0.931299
GOTERM_MF_DIRECT	GO:0003688~DNA replication origin binding	8	0.141543	0.0202907	ORC5, ORC6, CDC45, DDX11, MCM10, MCM5, HSPD1, MCM2	5010	11	16881	2.45052	1	0.935755	0.931299
GOTERM_MF_DIRECT	GO:0002020~protease binding	41	0.725407	0.020566	CST9L, CSTB, ECM1, LRP1, DERL1, TNFAIP3, TNF, CST5, CST4, SERPINA5, PANX1, COMP, PYCARD, CST3, CST2, OS9, CHL1, CASP3, UBC, TIMP2, DVL3, TIMP3, ITGAV, INSL3, LDLR, ELANE, TIMP4, POLG, XBP1, VWF, ANXA2, CD70, ITGA3, ADRM1, F3, SERPINB6, PINK1, FAP, NDUFS7, BCL2, LCN2	5010	101	16881	1.3678	1	0.935755	0.931299
GOTERM_MF_DIRECT	GO:0001047~core promoter binding	28	0.4954	0.0221101	RB1, CALCOCO1, HDAC2, NOTCH1, GTF2B, PARK7, ELK1, NPAS2, ELK4, POLR2A, DHX36, E2F2, E2F3, E2F7, E2F8, ZNF683, XBP1, TFAP2C, ZNF281, NONO, KLF4, RUNX1, SFPQ, MYBBP1A, AGO1, AGO2, IRF9, EZH2	5010	64	16881	1.47414	1	0.989517	0.984805
GOTERM_MF_DIRECT	GO:0005201~extracellular matrix structural constituent	29	0.513093	0.0229268	FBN2, FBN3, COL14A1, LAMA4, ELN, NCAN, FBLN1, HAPLN3, FBLN2, COMP, EFEMP2, COL24A1, LUM, MFAP5, COL1A1, COL3A1, CD4, VCAN, COL1A2, COL4A1, COL5A3, COL5A2, MGP, COL4A6, COL8A2, ANOS1, COL4A5, MATN3, FBN1	5010	67	16881	1.45842	1	1	0.995603
GOTERM_MF_DIRECT	GO:0001106~RNA polymerase II transcription corepressor activity	14	0.2477	0.023213	RERE, TCERG1, TFAP2B, URI1, TLE1, CITED2, PHF12, N4BP2L2, TBX18, TBX15, HEYL, SIN3A, HDGF, ELANE	5010	26	16881	1.81433	1	1	0.995603
GOTERM_MF_DIRECT	GO:0050431~transforming growth factor beta binding	10	0.176929	0.0238449	TGFBR3, ACVR1, TGFB3, LTBP4, ITGAV, CD36, LTBP3, VASN, ENG, TGFBR2	5010	16	16881	2.10591	1	1	0.995603
GOTERM_MF_DIRECT	GO:0036312~phosphatidylinositol 3-kinase regulatory subunit binding	7	0.12385	0.023915	FBXL2, PIK3R1, PIK3AP1, PTPN13, FAM83B, FAM83A, DNM2	5010	9	16881	2.62069	1	1	0.995603
GOTERM_MF_DIRECT	GO:0016301~kinase activity	87	1.53928	0.0248484	CDKN1C, PI4K2B, GSK3B, LRGUK, CDKN1B, CCNH, TRRAP, ADPGK, WDR83, CKS1B, MYLK, PLAU, RPS6KA2, NMRK1, CHEK1, PDK4, CKMT1B, NEK1, TLK1, TK2, SKP2, GIT1, CDKL3, CSNK2A1, SPHK2, RIPK2, DAPK1, SPHK1, MAGI3, PLAUR, CASK, MASTL, YWHAZ, BCR, DOK2, PKM, PRKAR1B, CCNE1, HGS, LCK, CSNK2B, BTK, STRAP, CMPK2, TRIB3, IDNK, PRKD1, RAF1, PRPS2, DTYMK, SRC, PRKDC, MAPKAP1, STK39, SGMS2, PIK3R1, PKMYT1, CKMT2, FGGY…	5010	241	16881	1.21636	1	1	0.995603
GOTERM_MF_DIRECT	GO:0005164~tumor necrosis factor receptor binding	15	0.265393	0.026562	TRAP1, CD70, STAT1, TNFSF13, FASLG, TRAF2, TRAF1, TNF, TNFSF13B, TRAF4, TRAF3, TNFSF10, LTA, TRIM37, LTB	5010	29	16881	1.74282	1	1	0.995603
GOTERM_MF_DIRECT	GO:0019888~protein phosphatase regulator activity	15	0.265393	0.026562	IGBP1, PPP1R15A, SET, PPP2R5B, EIF2AK2, PPP2R5A, PPP2R3B, PPP2R2A, PPP2R5D, PPP2R5C, PPP1R3C, PPME1, PPP1R3B, PPP1R7, PPP4R4	5010	29	16881	1.74282	1	1	0.995603
GOTERM_MF_DIRECT	GO:0008171~O-methyltransferase activity	6	0.106157	0.0274271	COQ3, COMTD1, HENMT1, BCDIN3D, ASMTL, COMT	5010	7	16881	2.88811	1	1	0.995603
GOTERM_MF_DIRECT	GO:1990446~U1 snRNP binding	6	0.106157	0.0274271	SNRPD2, SNRNP70, SNRPD1, SNRPG, SNRPC, SNRPA	5010	7	16881	2.88811	1	1	0.995603
GOTERM_MF_DIRECT	GO:0019843~rRNA binding	19	0.336164	0.0285605	MRPS17, MRPS15, RPS9, KDM2B, MTERF3, IMP3, FASTKD2, MRPL16, DDX21, RPL23A, ERAL1, MRPS7, RPL8, RPF2, RPL9, MRPL11, RPS4X, EMG1, ANG	5010	40	16881	1.60049	1	1	0.995603
GOTERM_MF_DIRECT	GO:0003678~DNA helicase activity	13	0.230007	0.0287772	PIF1, MCM7, ATRX, RAD54B, SUPV3L1, RUVBL2, RUVBL1, MCM3, MCM4, MCM5, DNA2, MCM6, MCM2	5010	24	16881	1.82512	1	1	0.995603
GOTERM_MF_DIRECT	GO:0000400~four-way junction DNA binding	9	0.159236	0.0294373	MSH6, RAD51D, RAD51, RAD51C, MSH2, XRCC3, HMGB2, HMGB3, MEN1	5010	14	16881	2.16608	1	1	0.995603
GOTERM_MF_DIRECT	GO:0004185~serine-type carboxypeptidase activity	9	0.159236	0.0294373	CTSA, DPP7, CPXM2, CPD, CPE, CPXM1, PRCP, AEBP1, CPZ	5010	14	16881	2.16608	1	1	0.995603
GOTERM_MF_DIRECT	GO:0043426~MRF binding	5	0.0884643	0.0295393	CREBBP, KDM1A, TSC22D3, BHLHE40, BHLHE41	5010	5	16881	3.36946	1	1	0.995603
GOTERM_MF_DIRECT	GO:0016829~lyase activity	16	0.283086	0.0296176	TSEN34, ADSL, GLDC, PHYKPL, PTGES2, MOCOS, APEX2, NPL, HOGA1, THNSL2, CLYBL, HMGCL, CRY2, HACL1, KYAT1, SCLY	5010	32	16881	1.68473	1	1	0.995603
GOTERM_MF_DIRECT	GO:0005543~phospholipid binding	35	0.61925	0.0317626	SPTBN4, DYSF, LPAR1, NOXO1, RASAL1, PLA2G7, SEC14L2, PREX1, BAIAP2L2, APOM, MAP1LC3A, GRK5, PSD4, PSD3, NUP62, APOE, ANXA9, SPTBN1, SNCA, SPTBN2, PRKCI, CARMIL2, TICAM2, F10, MYOF, NBEAL2, PLEKHA3, F3, SYTL4, NR5A2, CPS1, AMPH, OSBPL1A, VAMP2, NSMAF	5010	86	16881	1.37129	1	1	0.995603
GOTERM_MF_DIRECT	GO:0003735~structural constituent of ribosome	80	1.41543	0.0324404	MRPS17, SLC25A1, MRPS15, RPL3, MRPS14, RPL34, RPL10L, MRPS12, MRPL36, MRPL37, RPL8, RPL9, MRPL35, RPL6, MRPL4, RPS4X, MRPL42, MRPL3, MRPL2, RPS19, RPL36AL, SLC25A43, SLC25A42, MRPL9, RPS10, RPS13, RPS9, IMP3, MRPS22, RPL22, MRPS23, MRPS18A, MRPS2, MRPL47, MRPS7, MRPS5, MRPS9, MRPL51, SLC25A19, MRTO4, SLC25A10, RPL26, RPL29, SLC25A12, SLC25A5, SLC25A13, MRPS36, MRPL18, MRPS33, MRPS31, MRPL16, UCP1…	5010	222	16881	1.21422	1	1	0.995603
GOTERM_MF_DIRECT	GO:0004181~metallocarboxypeptidase activity	14	0.2477	0.0328548	CPA3, CPB1, AGTPBP1, CPXM2, AEBP1, CPZ, AGBL5, ACE2, FOLH1, CPD, AGBL2, CPE, CPXM1, CPA4	5010	27	16881	1.74713	1	1	0.995603
GOTERM_MF_DIRECT	GO:0043021~ribonucleoprotein complex binding	15	0.265393	0.0365046	SECISBP2, EIF4A3, WDR12, SMG7, SMG5, PQBP1, PPP1CA, IFIH1, RNF135, BOP1, PES1, CD2BP2, PPIH, PRPF31, EZH2	5010	30	16881	1.68473	1	1	0.995603
GOTERM_MF_DIRECT	GO:0000062~fatty-acyl-CoA binding	15	0.265393	0.0365046	ACAD8, ACADVL, ACBD4, ACOT7, ACAD9, ECI2, ACADSB, HMGCL, ALDH6A1, SCP2, ACOX2, ACOX1, IVD, ACADM, ACAD11	5010	30	16881	1.68473	1	1	0.995603
GOTERM_MF_DIRECT	GO:0051059~NF-kappaB binding	15	0.265393	0.0365046	GSK3B, HDAC2, CDKN2A, AKAP8, COMMD6, COMMD7, MTDH, PSMA6, BRMS1, DNAJA3, CPNE1, TP53BP2, TAF4B, CDK5RAP3, PPARD	5010	30	16881	1.68473	1	1	0.995603
GOTERM_MF_DIRECT	GO:0004872~receptor activity	78	1.38004	0.0366086	CD86, OGFR, SCARB2, ROBO4, CD40, ITGB5, ITGB2, SLC40A1, ANTXR2, MED16, PVR, TREM1, MED14, IL18RAP, ITGAX, ITGB7, TNPO3, CMKLR1, SEC63, UNC13B, CD93, PAQR4, ATP6AP2, TNFRSF19, PAQR3, PLAUR, CEL, JMJD6, PROCR, NPC1, RTN4RL1, TLR8, PLA2R1, CD46, TLR3, RTN4R, VAC14, NLGN1, RAMP3, NLGN2, NOTCH1, CUL5, LRP1, SLC20A1, DERL1, TACSTD2, RRBP1, TNFRSF11B, SLC1A5, NR2C2, LILRA2, LILRA3, PKHD1, MED30, CXCR3, …	5010	217	16881	1.21114	1	1	0.995603
GOTERM_MF_DIRECT	GO:0035064~methylated histone binding	23	0.406936	0.0439639	CBX8, L3MBTL1, CBX7, PHF2, CBX5, UHRF1, PHF1, CBX2, ATRX, NCAPG2, MSL3, CDYL, LRWD1, TDRD3, MSH6, TRIM24, WDR5, KAT8, NCAPD3, TP53BP1, ZMYND11, PHF19, GLYR1	5010	53	16881	1.46222	1	1	0.995603
GOTERM_MF_DIRECT	GO:0000175~3'-5'-exoribonuclease activity	11	0.194621	0.0445855	PAN2, ISG20, EXOSC5, EXOSC4, DIS3, EXOSC9, DIS3L, USB1, EXOSC3, CNOT8, EXOSC2	5010	20	16881	1.8532	1	1	0.995603
GOTERM_MF_DIRECT	GO:0019206~nucleoside kinase activity	7	0.12385	0.0449348	UCK2, TK2, AK5, TK1, DCK, AK8, AK9	5010	10	16881	2.35862	1	1	0.995603
GOTERM_MF_DIRECT	GO:0016595~glutamate binding	7	0.12385	0.0449348	CEP104, GCLC, CPS1, GAD1, SLC1A1, SLC1A3, GLUL	5010	10	16881	2.35862	1	1	0.995603
GOTERM_MF_DIRECT	GO:0005070~SH3/SH2 adaptor activity	24	0.424628	0.0452268	BCAR3, GRB7, SRC, SH2D2A, SH2D1A, ARHGAP1, SLA, SORBS1, STAM, SLA2, CRKL, SOCS2, SHE, SH3BGRL, GRB14, RUSC1, CHN2, CHN1, TP53BP2, NCK2, GRB2, SH2B2, SKAP1, NCK1	5010	56	16881	1.44405	1	1	0.995603
GOTERM_MF_DIRECT	GO:0004674~protein serine/threonine kinase activity	128	2.26469	0.045333	RPS6KA4, STK10, RPS6KA5, RPS6KA2, CHEK2, CHEK1, CDK20, PIM1, PDK3, NEK1, NEK2, PIM2, STK32B, MAP3K7, ACVR1, MAP2K3, PRKCI, MAP2K1, MAP2K2, CSNK2A1, DAPK1, OSR1, PRKCE, CSNK2A2, LMTK2, CASK, VRK1, CSNK1D, PRPF4B, PASK, NRBP1, BCR, MELK, CSNK2B, SIK3, MAPKAPK5, PRKCQ, PRKD1, RAF1, BRSK1, PRKDC, STK39, WNK4, PKMYT1, STK4, STK3, NUAK1, GRK5, IRAK1, STK35, STK36, STK38, MARK2, MAP2K5, SRPK2, PLK4, SRP…	5010	376	16881	1.14705	1	1	0.995603
GOTERM_MF_DIRECT	GO:0052890~oxidoreductase activity, acting on the CH-CH group of donors, with a flavin as acceptor	9	0.159236	0.0469662	ACAD8, ACADVL, ACOX2, ACOX1, IVD, ACAD9, ACADM, ACAD11, ACADSB	5010	15	16881	2.02168	1	1	0.995603
GOTERM_MF_DIRECT	GO:0005521~lamin binding	9	0.159236	0.0469662	BNIP3L, TMEM201, NARF, IFI27, PKP1, LBR, TOR1AIP1, SYNE1, TMPO	5010	15	16881	2.02168	1	1	0.995603
GOTERM_MF_DIRECT	GO:0004004~ATP-dependent RNA helicase activity	27	0.477707	0.0481866	EIF4A2, DDX49, DDX27, DDX24, YTHDC2, DDX23, EIF4A3, DDX21, DDX41, HELB, DHX32, DHX34, DHX36, DHX37, DHX16, DHX38, DDX17, DDX18, DDX55, DDX56, DDX31, DDX54, SUPV3L1, DDX19A, DDX39A, DHX29, SNRNP200	5010	65	16881	1.39962	1	1	0.995603
GOTERM_MF_DIRECT	GO:0005158~insulin receptor binding	15	0.265393	0.0488494	IRS1, SRC, IGF2, FRS2, IRS2, PIK3R1, SORBS1, IGF1, IGF1R, LMBRD1, SNX1, DOK2, SNX2, DOK6, INSL3	5010	31	16881	1.63038	1	1	0.995603
GOTERM_MF_DIRECT	GO:0030215~semaphorin receptor binding	12	0.212314	0.0506043	SEMA5A, SEMA7A, SEMA6A, SEMA3C, SEMA4D, SEMA6D, SEMA3B, SEMA4C, SEMA3G, SH3BGRL3, PLXNB1, SEMA3E	5010	23	16881	1.75798	1	1	0.995603
GOTERM_MF_DIRECT	GO:0004114~3',5'-cyclic-nucleotide phosphodiesterase activity	12	0.212314	0.0506043	PDE1B, PDE1A, PDE2A, PDE4A, PDE6B, PDE5A, PDE7B, PDE8B, PDE7A, PDE8A, TBC1D10B, RUNX1	5010	23	16881	1.75798	1	1	0.995603
GOTERM_MF_DIRECT	GO:0003729~mRNA binding	47	0.831564	0.0512175	SLBP, RBM25, JRK, SLC4A1AP, CSTF3, CSTF2, SRSF1, EIF4A3, CSTF2T, PARK7, TYMS, MRPL13, ZFP36L1, NXF1, ZFP36, PCF11, SNRNP70, NOCT, XPO5, DENR, IGF2BP2, NUDT16, PAIP2, RBM5, RPS13, RBM38, HSP90AA1, CPSF6, CLUH, NCBP2, LSM1, SAMD4A, UPF3B, SAMD4B, MRPS7, SUPT5H, THOC5, HNRNPAB, PUM3, RC3H2, DHFR, NOVA1, ESRP1, AGO2, CALR, SNRPC, DCP1B	5010	125	16881	1.26692	1	1	0.995603
GOTERM_MF_DIRECT	GO:0051219~phosphoprotein binding	16	0.283086	0.0521396	LYN, RB1, URI1, SRC, PLAT, PKD2, MID1, MID2, IGF2R, RRAGA, TBL2, GPRIN1, SFN, LRP11, PAFAH1B1, SNCA	5010	34	16881	1.58563	1	1	0.995603
GOTERM_MF_DIRECT	GO:0003700~transcription factor activity, sequence-specific DNA binding	309	5.46709	0.0535956	RB1, GABPB1, IKZF3, ELK1, CAPN15, IKZF5, ELK3, SPIB, ELK4, ZXDA, TRIM28, CREB3L4, MYC, SOX15, ZXDC, ZSCAN32, SOX7, SOX4, MNX1, HOXA5, TP63, MEF2A, ZNF165, HES6, ZNF18, MEF2C, ZNF281, SOX11, RUNX3, RUNX1, HCFC1, AR, DDIT3, HOXB4, HOXB3, ZSCAN26, HOXB2, HOXB8, ATF5, HOXB6, ATF4, L3MBTL1, EPAS1, SP140, GATA3, ZNF26, PGBD1, ZSCAN12, HIVEP2, NKX2-5, ZBED4, STAT5A, STAT5B, EGR1, JUN, XBP1, CREBBP, EGR3…	5010	961	16881	1.08342	1	1	0.995603
GOTERM_MF_DIRECT	GO:0019003~GDP binding	23	0.406936	0.053983	PRPS2, RAB2A, RALA, RAB4A, RAB5B, ARF1, RALB, ARL3, GNAI3, RAB27B, GEM, RERG, RHOB, RAB31, RRAGC, RAB35, RAB18, SUCLG2, KRAS, RAB28, RAB17, RAB8A, TRIM23	5010	54	16881	1.43514	1	1	0.995603
GOTERM_MF_DIRECT	GO:0015232~heme transporter activity	6	0.106157	0.0554139	SLC48A1, HPX, ABCB6, FLVCR1, FLVCR2, ABCG2	5010	8	16881	2.5271	1	1	0.995603
GOTERM_MF_DIRECT	GO:0031730~CCR5 chemokine receptor binding	6	0.106157	0.0554139	STAT1, CCL5, STAT3, CCL4, CNIH4, JAK1	5010	8	16881	2.5271	1	1	0.995603
GOTERM_MF_DIRECT	GO:0003684~damaged DNA binding	26	0.460014	0.056981	DCLRE1A, FEN1, PCNA, HMGB2, XPC, BRCA1, UNG, TDG, POLD1, TP63, POLQ, CREBBP, XRCC6, REV1, RAD23A, FANCG, MSH6, NEIL3, NEIL2, MSH2, ERCC3, MSH3, ERCC1, CRY2, MSH5, NEIL1	5010	63	16881	1.39057	1	1	0.995603
GOTERM_MF_DIRECT	GO:0070016~armadillo repeat domain binding	8	0.141543	0.0589915	CALCOCO1, RGS19, CNOT1, LEF1, RGS20, STRN, AXIN2, STRN4	5010	13	16881	2.07351	1	1	0.995603
GOTERM_MF_DIRECT	GO:0015179~L-amino acid transmembrane transporter activity	8	0.141543	0.0589915	SLC7A4, SLC7A5, SLC7A6, SLC7A7, SLC7A8, SLC43A1, SLC38A7, SLC7A2	5010	13	16881	2.07351	1	1	0.995603
GOTERM_MF_DIRECT	GO:0008143~poly(A) binding	8	0.141543	0.0589915	SYNCRIP, HNRNPDL, RBPMS, PABPC4, EIF4A3, PABPC3, PABPC1, ZC3H14	5010	13	16881	2.07351	1	1	0.995603
GOTERM_MF_DIRECT	GO:0070628~proteasome binding	8	0.141543	0.0589915	USP13, PSMD14, UBD, ID1, ADRM1, PSME4, PSMG1, UCHL5	5010	13	16881	2.07351	1	1	0.995603
GOTERM_MF_DIRECT	GO:0003727~single-stranded RNA binding	19	0.336164	0.0596025	CBX8, CBX7, CBX6, MTERF3, DDX11, JMJD6, IFIH1, NXF1, ZFP36, AGO3, LACTB2, AGO1, AGO2, POLR2D, LONP1, TLR8, POLR2G, SNRPC, HNRNPA1	5010	43	16881	1.48883	1	1	0.995603
GOTERM_MF_DIRECT	GO:0061631~ubiquitin conjugating enzyme activity	14	0.2477	0.0600994	UBE2D4, UBE2B, UBE2C, UBE2D2, UBE2E2, UBE2A, UBE2Z, CDC34, UBE2Q1, UBE2S, UBE2Q2, UBE2T, UBE2V2, UBE2O	5010	29	16881	1.62664	1	1	0.995603
GOTERM_MF_DIRECT	GO:0003887~DNA-directed DNA polymerase activity	14	0.2477	0.0600994	POLQ, PRIM2, POLN, PRIMPOL, POLD3, POLA1, POLA2, MYBBP1A, POLD1, POLE2, POLD2, POLE3, POLE, POLG	5010	29	16881	1.62664	1	1	0.995603
GOTERM_MF_DIRECT	GO:0008233~peptidase activity	35	0.61925	0.0602224	APP, TMPRSS3, PAPLN, HPN, OTUD7A, PARK7, PCSK5, CAPN15, SERPINA5, CASP9, IMMP2L, APH1B, PSMB5, CASP3, HMCES, CAPN3, CTSG, AGA, ELANE, DESI1, DESI2, PPP2R5C, KY, NAALADL1, BACE1, CAPN11, FOLH1, SPCS1, FAP, ESPL1, CLPP, PSMC2, PIGK, CTRC, LGMN	5010	90	16881	1.31035	1	1	0.995603
GOTERM_MF_DIRECT	GO:0044212~transcription regulatory region DNA binding	75	1.32696	0.0615589	FOXA1, RNF10, CALCOCO1, THRA, CITED1, KDM1A, HMGB2, ARID4A, SIX1, ARRB1, TCF20, BRCA1, GABPB1, IKZF3, TNF, TAF7L, HHEX, SALL2, SOX17, SOX18, HNF4A, SNAPC4, SOX7, TP63, GABPA, ZNF200, MEN1, KLF11, MEF2C, ZNF281, TCF12, WNT5A, ARID5A, ARID5B, FOS, POU5F1, OVOL2, AR, SFPQ, NCOR1, NR5A2, DDIT3, ZNF516, PPARG, ATF5, ATF4, YAP1, LEF1, GATA3, WNT11, RXRA, DHX36, HIVEP1, ZNF746, HIVEP2, MTA2, BRD7, NKX2-…	5010	213	16881	1.18643	1	1	0.995603
GOTERM_MF_DIRECT	GO:0017056~structural constituent of nuclear pore	11	0.194621	0.0630614	NUP93, NDC1, NUP205, NUP107, POM121C, NUP188, NUP155, NUP85, NUP62, NUP153, NUP98	5010	21	16881	1.76496	1	1	0.995603
GOTERM_MF_DIRECT	GO:0019894~kinesin binding	16	0.283086	0.0669542	SPAG9, NEK6, CLSTN1, LRP8, ACTB, KTN1, KLC3, KLC2, KIF18B, PRC1, CROCC, NUP62, FAM83D, NEFH, SYBU, SNCA	5010	35	16881	1.54033	1	1	0.995603
GOTERM_MF_DIRECT	GO:0051920~peroxiredoxin activity	5	0.0884643	0.0678651	PRDX5, PRDX4, SESN1, PRDX1, PARK7	5010	6	16881	2.80788	1	1	0.995603
GOTERM_MF_DIRECT	GO:0015288~porin activity	5	0.0884643	0.0678651	TOMM40, AQP9, VDAC3, VDAC2, VDAC1	5010	6	16881	2.80788	1	1	0.995603
GOTERM_MF_DIRECT	GO:0008420~CTD phosphatase activity	5	0.0884643	0.0678651	CTDP1, PPM1M, CTDSP1, CTDSP2, SSU72	5010	6	16881	2.80788	1	1	0.995603
GOTERM_MF_DIRECT	GO:0050660~flavin adenine dinucleotide binding	26	0.460014	0.0679562	ACADVL, KDM1A, ETFDH, FOXRED2, AIFM1, LDHD, AOX1, D2HGDH, ACADM, ACAD11, ACAD8, TXNRD1, ACAD9, MTHFR, SDHA, ACADSB, DUS2, SQLE, POR, ACOX2, ACOX1, IVD, CHDH, DUS1L, FMO6P, DUS3L	5010	64	16881	1.36884	1	1	0.995603
GOTERM_MF_DIRECT	GO:0003995~acyl-CoA dehydrogenase activity	9	0.159236	0.0700875	ACAD8, ACADVL, ACOX2, ACOX1, IVD, ACAD9, ACADM, ACAD11, ACADSB	5010	16	16881	1.89532	1	1	0.995603
GOTERM_MF_DIRECT	GO:0003779~actin binding	95	1.68082	0.0736954	FHOD3, ARPC1A, LMOD1, DIXDC1, PPP1R18, MYLK, SYNE1, BAIAP2L1, RUSC1, MYOZ3, SPTAN1, EMD, YWHAH, GAS2L3, DST, LIMCH1, TPM1, MYRIP, ACTN4, SYNPO2L, DAAM2, PALLD, TNNT2, KCNMA1, TNNT3, EVL, ANG, LCP1, DNASE1, PFN1, DBN1, CAMK2B, SPTBN4, MACF1, TAGLN, PLEKHH2, PXK, CAPG, NOD2, IQGAP2, CORO1A, ACTR3B, ADD1, CNN3, FGD4, CNN1, ABLIM1, ABLIM2, ABLIM3, MYO6, XIRP1, EPS8L1, FLNB, VILL, MYH10, GBP1, SPTBN1,…	5010	278	16881	1.15143	1	1	0.995603
GOTERM_MF_DIRECT	GO:0032403~protein complex binding	72	1.27389	0.0765089	RPAIN, CDKN1B, THRA, FLT3, ITGB2, BRK1, PPP2R2A, CTSV, KIF11, NR3C1, RPTOR, C8G, SIN3A, MYC, CASP3, CDK5RAP1, NCK2, UQCRFS1, GIT1, NCOA1, SREBF1, RIPK3, TUBB, CEP131, COG2, TRAF2, PDZK1, LZTFL1, DNM1, DNM2, KAT6B, PGAM5, VDAC1, UQCRC2, SKAP1, PAFAH1B1, TMED10, LRP1, CUL2, TULP3, FBLN1, CAPG, STRN4, HMBOX1, NRAS, SHARPIN, ATG101, EPCAM, NCKAP1L, SPTBN1, IGBP1, BCAP31, NDUFA9, NDUFA8, AOC1, CARMIL2…	5010	206	16881	1.17768	1	1	0.995603
GOTERM_MF_DIRECT	GO:0005534~galactose binding	4	0.0707714	0.0812202	COLEC12, LGALS9, ENG, GALK1	5010	4	16881	3.36946	1	1	0.995603
GOTERM_MF_DIRECT	GO:0035173~histone kinase activity	4	0.0707714	0.0812202	CCNB1, CDK2, CDK1, BAZ1B	5010	4	16881	3.36946	1	1	0.995603
GOTERM_MF_DIRECT	GO:0016799~hydrolase activity, hydrolyzing N-glycosyl compounds	4	0.0707714	0.0812202	NEIL2, MAN2A2, MAN2A1, NEIL1	5010	4	16881	3.36946	1	1	0.995603
GOTERM_MF_DIRECT	GO:0030546~receptor activator activity	4	0.0707714	0.0812202	ANXA2, PRKCE, IGF2, PPARGC1B	5010	4	16881	3.36946	1	1	0.995603
GOTERM_MF_DIRECT	GO:0034513~box H/ACA snoRNA binding	4	0.0707714	0.0812202	DKC1, GAR1, NHP2, NOP10	5010	4	16881	3.36946	1	1	0.995603
GOTERM_MF_DIRECT	GO:0004470~malic enzyme activity	4	0.0707714	0.0812202	MDH1, ME1, ME3, ME2	5010	4	16881	3.36946	1	1	0.995603
GOTERM_MF_DIRECT	GO:0001882~nucleoside binding	4	0.0707714	0.0812202	CDA, POLA1, PNP, ACTN4	5010	4	16881	3.36946	1	1	0.995603
GOTERM_MF_DIRECT	GO:0003917~DNA topoisomerase type I activity	4	0.0707714	0.0812202	TOP3B, TOP1MT, TOP3A, TOP1	5010	4	16881	3.36946	1	1	0.995603
GOTERM_MF_DIRECT	GO:0043531~ADP binding	15	0.265393	0.0815315	PRPS2, VCP, TAP1, MYO9B, MYO7A, MSH6, GLUD1, GCLC, PKM, MSH2, MYO6, CHORDC1, ME1, LONP1, MYH10	5010	33	16881	1.53157	1	1	0.995603
GOTERM_MF_DIRECT	GO:0004879~RNA polymerase II transcription factor activity, ligand-activated sequence-specific DNA binding	16	0.283086	0.0843255	ESRRA, STAT3, RORC, NR2F1, RORA, RORB, NR2F2, ESR1, NR2F6, NR4A2, AR, RXRA, NR5A2, HNF4A, PPARG, PPARD	5010	36	16881	1.49754	1	1	0.995603
GOTERM_MF_DIRECT	GO:0044183~protein binding involved in protein folding	8	0.141543	0.0885457	CCT3, CCT6A, CCT2, PDCL3, RIC3, PFDN1, CALR, CLGN	5010	14	16881	1.92541	1	1	0.995603
GOTERM_MF_DIRECT	GO:0050811~GABA receptor binding	8	0.141543	0.0885457	PPP2CA, GABARAPL2, ARFGEF2, PLCL1, MAF1, TRAK1, GABARAP, TRAK2	5010	14	16881	1.92541	1	1	0.995603
GOTERM_MF_DIRECT	GO:0005178~integrin binding	39	0.690021	0.0886522	SEMA7A, CD151, COL16A1, ECM2, SRC, LTBP4, CIB2, FBLN1, FGF1, FBLN5, THBS4, ADAMTS5, TNN, TSPAN4, TIMP2, ANXA7, EDIL3, JAM3, LYN, EGFL6, SYK, VWF, DST, LAMB2, ITGA3, ACTN4, IGF1, NPNT, NISCH, COL3A1, ADAM17, SFRP2, FAP, P4HB, CALR, PLPP3, PTPN2, FBN1, FERMT3	5010	105	16881	1.25151	1	1	0.995603
GOTERM_MF_DIRECT	GO:0005516~calmodulin binding	66	1.16773	0.0900504	INVS, MYLK, PPP3CB, PPP3CC, CAMKV, SPTAN1, KCNH1, UNC13B, IQCB1, CAMK1D, DAPK1, SPHK1, CASK, PHKA1, MYO7A, GEM, ASPM, SPATA17, KCNQ3, ORAI1, MAPKAPK5, VAMP2, CAMK2B, PDE1B, RRAD, PDE1A, CACNA1C, AEBP1, ADCY1, IQGAP2, IQGAP3, STRN4, ADD1, SLC9A1, CNN3, CNN1, PPP3R1, MAP2, MYO6, MKNK2, MAP6, MYH11, KCNN4, PCNT, MYH10, CAMK2G, SPTBN1, TRPM4, MARCKSL1, MYO10, WFS1, MYO5A, MYO9B, TJP1, RIT1, MYO1C, TR…	5010	189	16881	1.17664	1	1	0.995603
GOTERM_MF_DIRECT	GO:0043022~ribosome binding	21	0.37155	0.0921741	EIF5A, YTHDF1, NAA10, RPN2, HSPA5, MRPL58, MTIF3, EEF2, MAIP1, SEC61A2, SEC61A1, CPEB1, SPCS1, EIF6, DENR, NAA15, CPEB3, LETMD1, CPEB2, GCN1, ABCF1	5010	51	16881	1.38743	1	1	0.995603
GOTERM_MF_DIRECT	GO:0019900~kinase binding	29	0.513093	0.0937363	RB1, MIDN, CEBPB, HSP90AB1, SRC, SLC2A1, TNFAIP3, PARK7, JAKMIP3, PRDX3, LDHB, LDHA, WDCP, UBQLN1, FLNA, PDE8A, TNS2, BARD1, PPP2R5A, CDC6, SGO1, PFKL, DLG2, PER3, DLG4, TOLLIP, IGSF9B, ATF5, STX1A	5010	75	16881	1.30286	1	1	0.995603
GOTERM_MF_DIRECT	GO:0048495~Roundabout binding	6	0.106157	0.0947875	TGFB1I1, OGN, MYO9B, SLIT3, SLIT2, FMOD	5010	9	16881	2.24631	1	1	0.995603
GOTERM_MF_DIRECT	GO:0004559~alpha-mannosidase activity	6	0.106157	0.0947875	EDEM3, MAN2A2, MAN2A1, EDEM2, MAN2B1, MAN2C1	5010	9	16881	2.24631	1	1	0.995603
GOTERM_MF_DIRECT	GO:0004180~carboxypeptidase activity	9	0.159236	0.0990032	CTSA, ACE2, CPB1, CPQ, CPE, CPXM1, PRCP, AEBP1, NAALADL1	5010	17	16881	1.78383	1	1	0.995603
GOTERM_MF_DIRECT	GO:0050699~WW domain binding	14	0.2477	0.0992984	DAZAP2, WBP1, CDC25C, WBP11, DNM2, FAM189B, TCEAL4, TRAF4, TCEAL3, SCNN1B, TCEAL2, TCEAL1, PMEPA1, TP63	5010	31	16881	1.52169	1	1	0.995603
